# Supplementary material for: Expectancy effects in the Autonomous Sensory Meridian Response
Source: PeerJ. 2018 Aug 22;6:e5229. doi: 10.7717/peerj.5229 (PMC6109369; doi:10.7717/peerj.5229)
Supplement: Supplemental Information 1 [file peerj-06-5229-s001.xlsx]

## Sheet: Data
LSU/ASMR	Duration (in seconds)	InduceNoinduce	ASMR	Age	Gender	Ethnicity	Instruct	RealASMR	Q68_First Click	Q68_Last Click	Q68_Page Submit	Q68_Click Count	AltASMR	Q68_First Click	Q68_Last Click	Q68_Page Submit	Q68_Click Count	Control	Q68_First Click	Q68_Last Click	Q68_Page Submit	Q68_Click Count	Q10	Q11	Q12	UsuallyWatchASMR	Q14	Q15	Q16	Q17	Q18	Q19	Q20	Q21	Q22	Q28	Q29	mTurkCode
1	1407	1	1	20	2	1	1	2	100.467	260.747	304.608	6	2	309.676	310.646	311.149	2	4	216.568	216.568	303.712	1	N/A	N/A	N/A	2	n/a	8	N/A	2	3		N/A	N/A	11	N/A	To determine if people react to these videos or not	155509
1	1181	1	1	20	2	1	1	7	44.335	161.064	305.273	2	3	174.422	267.686	313.171	2	7	243.94	243.94	321.497	1	N/A	N/A	N/A	2	N/A	8	N/A	1	1	1,2,4	N/A	N/A	1,4	N/A	see if sounds trigger tingling sensations	211032
1	1287	1	1	18	1	1	1	2	287.229	287.229	307.717	1	1	160.366	160.366	308.155	1	1	255.78	256.627	302.796	2	N/A	N/A	N/A	2	N/A	8	N/A	2	1	2	N/A	N/A	1,2,3,5,7	N/A	To see what stimuli might make a person exhibit ASMR.	241403
1	1356	1	1	18	2	1	1	3	309.325	313.013	313.842	3	3	335.721	335.721	337.495	1	4	309.535	309.535	310.348	1	No	No	Yes, I take anxiety and depression medication called celexa.	2	N/A	8	N/A	1	3		N/A	N/A	1	N/A	The purpose was to test the strength our our memory and sensations such as hearing the ASMR and feeling tingling sensations.	968959
1	93719	1	1	21	2	2	1	1	312.885	312.885	314.603	1	1	316.163	316.163	316.847	1	2	316.301	316.301	320.258	1	n/a	yes	birth control, OTC pain killers	2	n/a	8	n/a	2	3		n/a	talking	3,6	n/a	to test the effects of ASMR	215209
1	5723	1	1	20	2	1	1	4	305.013	305.013	305.966	1	1	305.645	305.645	306.709	1	7	313.325	313.325	314.42	1	N/A	sense shapes from music	adderall	2	N/A	8	N/A	1	1	1,2,3,6,10	N/A	N/A	1,10	N/A	to see how people react to ASMR videos	655536
1	1222	1	1	22	1	3	1	4	316.595	317.335	318.827	2	3	303.949	303.949	305.337	1	6	304.607	306.215	306.837	2	N/A	N/A	Adderall, Vyvans, Antidepressants	2	N/A	8	N/A	1	2	1,4	N/A	N/A	1,5	N/A	I have no idea.	589179
1	9372	1	1	21	2	1	1	2	332.832	337.768	339.831	2	2	308.978	308.978	310.61	1	6	304.968	304.968	305.747	1	N/A	N/A	N/A	2	N/A	8	N/A	2	2		N/A	N/A	5	N/A	To study the effects of ASMR on different people	593165
1	1244	1	1	19	2	1	1	5	305.421	305.421	306.214	1	5	352.094	352.094	353.564	1	6	304.51	305.454	308.173	2	N/A	N/A	Prozac	2	N/A	8	N/A	1	1	1,3	N/A	N/A	2,4	N/A	To study ASMR	756399
1	1261	1	1	21	1	1	1	2	309.674	309.674	311.023	1	3	7.063	296.487	302.167	25	6	90.538	300.783	307.292	2	N/A	N/A	N/A	2	N/A	8	N/A	1	2		N/A	N/A	1,4	N/A	To understand what type of sensory data causes parts of the human body to start experiencing these tingling sensations.	316635
1	1179	1	1	21	2	1	1	2	307.592	307.592	308.454	1	1	306.204	306.204	307.494	1	3	311.717	311.717	312.731	1	N/A	N/A	Concerta for ADD	2	N/A	8	N/A	2	3		N/A	N/A	11	N/A	To determine what types of sounds affect certain people.	587262
1	1419	1	2	18	1	1	1	4	320.633	321.657	322.934	2	4	316.735	318.502	325.737	2	2	316.668	316.668	319.653	1	N/A	N/A	N/A	2	N/A	8	N/A	2	3		N/A	N/A	11	N/A	seeing what types of sounds causes ASMR	361581
1	1167	1	2	18	2	1	1	2	128.657	312.521	313.978	2	2	303.713	303.713	304.513	1	3	51.626	303.802	304.761	2	N/A	N/A	N/A	2	N/A	8	N/A	2	3		N/A	N/A	11	N/A	I think the purpose of the study was to see which age group and gender responded to the ASMR more so than others and if there are environmental factors that contribute.	502362
1	1160	1	2	19	1	4	1	2	313.979	315.786	316.143	3	5	18.072	304.418	318.406	4	3	34.449	248.657	305.958	3	N/a	N/A	N/A	2	N/A	8	N/A	1	1	1	N/A	N/A	2,4	N/A	To see you are affected by a stimulus or what degree you are affected by it	775640
1	1201	1	2	19	2	1	1	2	306.199	306.199	307.218	1	1	305.196	305.763	311.93	2	1	9.77	304.779	306.456	2	N/A	N/A	N/A	2	N/A	8	N/A	2	2		N/A	N/A	11	N/A	I honestly have no idea but it was very interesting, I have never heard of ASMR. Might have something to do with our hearing and senses?	832561
1	1181	1	2	19	2	1	1	4	10.213	10.213	302.107	1	3	158.935	158.935	303.769	1	2	30.475	110.137	303.017	2	N/A	N/A	N/A	2	N/A	8	N/A	2	3		N/A	N/A	11	N/A	to see how different ASMR triggers affect different people	701715
1	1197	1	2	22	1	1	1	3	270.001	270.001	304.645	1	6	296.115	296.115	304.322	1	5	306.007	306.007	307.502	1	N/A	N/A	N/A	2	n/a	8	N/A	1	1		Gregorian Chants	Loud Noises or Talking	5	n/a	To see which sounds stimulate brain activity.	827172
1	1206	1	2	18	2	1	1	5	308.205	308.205	312.226	1	4	306.637	306.637	308.155	1	7	302.838	302.838	323.758	1	N/A	N/A	N/A	2	N/A	8	N/A	1	1	1,7	N/A	N/A	2,4,6,9	N/A	To find out what stimuli cause ASMR sensations	427118
1	3441	1	2	18	2	1	1	6	248.683	250.787	301.651	2	6	45.861	144.461	302.437	2	5	13.35	119.966	303.065	4	N/A	Sensing shapes for music	Welbutrin	2	N/A	8	N/A	1	1	1	N/A	Softer low pitch sounds	1	N/A	To measure how different peoples senses react to the same stimuli	218974
1	1119	1	2	19	2	2	1	1	128.834	128.834	313.11	1	2	20.126	160.006	306.864	2	1	302.373	302.373	305.643	1	N/A	N/A	N/A	2	N/A	8	N/A	2	3		N/A	N/A	11	N/A	To see what sounds could trigger my nerves/ different sensations in my body.	60944
1	1145	1	2	19	2	2	1	3	314.537	314.537	315.484	1	3	303.916	303.916	304.825	1	2	306.297	306.297	307.205	1	N/A	N/A	N/A	2	N/A	8	N/A	2	3		N/A	N/A	1,2,5	N/A	I think the purpose of this study was to learn whether or not ASMR audio affected sensory perceptions, particularly touch.	645488
1	1124	1	3	20	2	2	1	2	305.532	306.372	307.239	2	1	303.846	303.846	305.223	1	5	315.187	315.187	316.304	1	n/a	n/a	n/a	2	n/a	8	n/a	2	3		n/a	n/a	11	n/a	I'm not quite sure to be honest. Maybe to see if would respond by listening to these ASMR videos.	369818
1	1117	1	3	19	2	1	1	3	311.037	311.037	312.078	1	3	307.519	307.519	308.581	1	4	309.333	309.333	310.251	1	N/A	N/A	Yes, anxiety medication.	2	N/A	8	N/A	2	3		N/A	N/A	11	N/A	To see what influences whether or not people experience ASMR	845567
1	1134	1	3	19	2	1	1	6	26.14	27.981	302.569	2	3	275.635	276.491	302.782	2	5	28.009	28.009	307.248	1	N/A	N/A	N/A	2	N/A	8	N/A	1	1	1,2,6,7,9,10	N/A	N/A	1	N/A	find out how different people experience ASMR	865669
1	1296	1	3	20	2	1	1	2	153.988	181.827	313.355	2	4	18.229	18.229	303.57	1	3	57.241	256.033	302.457	2	n/a	n/a	n/a	2	n/a	8	n/a	2	3		n/a	n/a	11	n/a	I thought it was to test memory, but it seemed to test more of our speed ability and accuracy in answering the questions correctly. If it was just about memory, i think i would have been given longer to review/answer...	483800
1	3679	1	3	18	2	1	1	2	186.752	186.752	302.222	1	1	145.768	145.768	301.804	1	3	240.454	298.399	303.412	3	N/A	N/A	yes for type 1 diabetes	2	N/A	8	N/A	1	2	1,7,8	N/A	N/A	5	N/A	To see what certain triggers can affect a wide range of people and how they perceive the sound	929496
1	3690	1	3	19	1	1	1	3	314.353	314.353	315.215	1	3	318.729	318.729	324.712	1	4	321.783	321.783	322.768	1	N/A	N/A	N/A	2	N/A	8	N/A	1	1	1,2,4,6	N/A	N/A	4,9,10	N/A	Find peoples ASMR triggering spots.	909229
1	1058	1	3	21	2	1	1	2	161.149	237.341	304.895	2	4	181.684	206.695	303.948	4	6	128.376	128.376	303.496	1	n/a	n/a	n/a	2	n/a	8	n/a	2	3		n/a	n/a	11	n/a	How/when ASMR occurs	406521
1	1156	1	3	18	2	1	1	5	286.944	286.944	304.249	1	3	140.199	140.199	310.65	1	1	262.394	263.556	304.939	3	N/A	N/A	N/A	2	N/A	8	N/A	2	2		N/A	N/A	11	N/A	To study what triggers people to hear the static sound and where it makes them tingle as a result	182839
1	9134	1	3	20	2	1	1	1	249.594	249.594	305.34	1	2	304.46	304.46	307.184	1	2	303.935	303.935	307.596	1	N/A	N/A	Welbutrin	2	N/A	8	N/A	2	3		N/A	N/A	11	N/A	If certain sounds or the things associated with that sound trigger he ASMR	875755
1	1408	1	3	18	1	4	1	4	310.623	310.623	311.571	1	2	309.667	309.667	310.682	1	3	309.715	311.002	311.926	3	N/A	On the piano clip, I visualized a scale and the notes being played.	N/A	2	N/A	8	N/A	1	1	1,2,4,10	When the sound comes from one side of the headphone.	Realization of reality after being immersed	1,2,3,4	N/A	To indicate what types of sounds are more likely to have a person experience ASMR	548675
1	1381	1	3	18	1	1	1	6	295.753	295.753	302.984	1	4	289.131	289.131	306.677	1	3	322.948	322.948	325.21	1	N/A	N/A	N/A	2	N/A	8	N/A	1	1	2,4	N/A	N/A	3,5	N/A	The purpose of this was to see if these specific sounds in the clips presented would cause a greater feeling of ASMR than other sounds.	746784
1	1225	1	4	20	2	1	1	2	303.479	303.479	304.314	1	1	15.763	303.219	305.176	2	1	5.998	368.443	369.442	2	N/A	I sometimes see numbers as colors	birth control	2	N/A	8	N/A	1	1	5	sometimes cooking videos	N/A	1	N/A	finding what things are common to produce ASMR	415332
1	1136	1	4	20	2	1	1	7	208.143	208.143	305.305	1	3	309.528	309.528	327.33	1	6	305.21	305.21	310.641	1	N/A	N/A	Yes, wellbutrin	2	N/A	8	N/A	1	2	1,5,6	N/A	N/A	1	N/A	To test individual's ability to hear/ feel ASMR videos.	612782
1	1029	1	4	18	1	1	1	1	223.025	223.025	303.925	1	1	17.058	248.458	302.103	2	1	14.152	197.015	301.684	2	N/A	N/A	N/A	2	N/A	8	N/A	2	3		N/A	N/A	11	N/A	to see if everyone experiences ASMR	972042
1	1118	1	4	19	2	1	1	2	248.503	248.503	301.795	1	2	287.176	287.176	302.349	1	2	305.533	305.533	306.712	1	N/A	N/A	N/A	2	N/A	8	N/A	2	3		N/A	N/A	11	N/A	To see if a certain sequence of sounds trigger stimuli throughout your body.	328281
1	1109	1	4	21	1	1	1	3	8.76	309.821	310.767	7	1	310.33	310.33	311.946	1	1	89.489	311.217	312.07	7	N/A	N/A	N/A	2	N/A	8	N/A	2	3		N/A	N/A	11	N/A	To examine ASMR response and potentially triggers.	347210
1	1226	1	4	18	1	1	1	1	304.271	304.271	305.852	1	2	35.557	304.647	306.491	2	5	347.87	347.87	348.778	1	N/A	N/A	N/A	2	N/A	8	N/A	2	3		N/A	N/A	11	N/A	To see how ASMR affects people and in what places it originates.	70537
1	5386	1	4	20	2	1	1	1	306.113	306.113	308.366	1	1	317.86	317.86	318.535	1	1	309.804	309.804	311.127	1	N/A	N/A	N/A	2	N/A	8	N/A	2	3		N/A	N/A	11	N/A	To determine what sounds lead to an ASMR tingling sensation.	954056
1	1767	1	4	19	2	4	1	1	308.098	308.098	310.824	1	4	308.305	308.305	309.14	1	1	312.067	312.067	313.284	1	N/A	Yes, sense shapes from music. Goosebumps from music	N/A	2	N/A	8	N/A	2	3		N/A	N/A	11	N/A	To find out what kinds of sounds induce ASMR and what kinds of sounds inhibit or lessen it	525465
1	1158	1	4	20	2	1	1	1	327.68	328.622	329.96	2	1	37.358	305.051	306.156	2	1	310.852	310.852	312.304	1	N/A	N/A	N/A	2	N/A	8	N/A	2	3		N/A	N/A	11	N/A	I think the purpose of this study was to determine the effects of possibly simulating ASMR.	489397
1	4416	1	4	19	2	2	1	7	62.909	302.553	303.555	2	5	32.928	323.273	324.285	2	5	307.849	307.849	308.733	1	N/A	N/A	keppa	2	N/A	8	N/A	2	3		N/A	N/A	11	N/A	The purpose of this study was to gain an understanding of people who experience ASMR and those who do not. And if someone does experience it (ASMR) where in the body.	638454
1	1995	1	5	24	2	1	1	3	306.053	306.053	307.195	1	6	322.744	322.744	323.68	1	1	303.154	303.154	304.073	1	HERNIATED DISC IN MY NECK	I EXPERIENCE BOTH OF THOSE	EFFEXOR AND FOCALIN	2	N/A	8	I HAVE ONLY WATCHED ONE BEFORE AND I NEED SEMI-QUIET SURROUNDINGS	1	1	1,2,4,7	N/A	QUICK CHANGE TO A VER DIFFERENT STIMULI	1,2	N/A	TO FIND THE MOST RESPONSIVE STIMULI AMONG THE GENERAL POPULATION	363197
1	1316	1	5	20	2	2	1	3	306.076	306.756	311.07	2	1	207.049	217.217	302.02	2	1	304.931	304.931	306.164	1	n/a	n/a	n/a	2	n/a	8	n/a	1	1	1,2	n/a	n/a	1	n/a	To find out why the sensations occur and where they originate	813596
1	1134	1	5	19	2	1	1	7	8.627	170.315	303.524	3	7	25.913	50.176	302.02	2	6	31.236	133.681	306.144	5	N/A	N/A	N/A	2	N/A	8	N/A	1	1	1,10	N/A	N/A	1,6,10	N/A	To differientiate between different forms of stimulius whether they are present or not.	431381
1	1132	1	5	20	2	1	1	6	29.883	29.883	303.369	1	7	53.189	53.774	302.027	2	3	309.735	309.735	312.19	1	migraines	N/A	relpax- migraines, birth control, zofran- nausea, celexa- antideppresant, xanax- antianxiety	2	N/A	8	N/A	1	1	1,2	N/A	N/A	2,4	N/A	figure out what noises trigger ASMR	65584
1	1120	1	5	20	2	2	1	5	40.089	209.753	308.206	2	4	77.795	77.795	302.073	1	2	68.53	69.075	303.932	2	N/A	N/A	N/A	2	N/A	8	N/A	1	1	2,4,8,10	N/A	temperature	1,4,6,7,8	N/A	To examine the physical responses and sensations of unexpected noises, music, or voices	809665
1	1188	1	5	19	2	1	1	7	313.296	313.296	315.868	1	4	305.655	305.655	307.142	1	5	306.799	309.887	310.671	2	n/a	n/a	n/a	2	n/a	8	n/a	1	3	1,2,3,8	n/a	n/a	2	n/a	To see how sounds can cause stimulation	462952
1	1546	1	5	20	2	2	1	7	310.844	310.844	317.817	1	7	311.131	311.131	315.007	1	3	337.563	337.563	339.861	1	migraines	I believe that letters, numbers, and colors have different personalities and genders.	Allergy medication and medication for diabetes type 2	2	N/A	8	N/A	2	3		N/A	N/A	11	N/A	I think this study tested our perceptions of certain sounds and how they stimulate our body.	46125
1	1151	1	5	20	2	2	1	5	305.654	305.654	307.412	1	5	221.466	221.466	303.062	1	2	268.933	268.933	303.783	1	No	No	No	2	N/A	8	N/A	1	1	1,2,4,10	N/A	Outside noise	4,5	N/A	To determine, the effects of ASMR clips on different people and to what extent do they feel these effects.	96469
1	9506	1	5	20	2	2	1	7	20.79	20.79	303.545	1	4	171.988	171.988	304.496	1	7	31.927	31.927	304.446	1	N/A	N/A	N/A	2	N/A	8	N/A	1	1	1,2	N/A	N/A	11	N/A	To test my response to hearing a specific type of sound.	386808
1	1231	1	5	20	2	2	1	2	317.187	317.187	318.379	1	4	35.374	310.759	311.883	2	5	304.332	304.332	305.412	1	N/A	N/A	N/A	2	N/A	8	N/A	1	2		N/A	Any distraction	2,5,6	N/A	To test what sounds cause ASMR.	503274
1	3725	1	5	18	2	1	1	3	307.04	307.04	307.747	1	5	290.64	290.64	317.381	1	6	309.418	309.418	310.406	1	N/A	I see school subjects in specific colors: English is red, History is orange, science is green, Astronomy is blue, social studies is purple, math is also blue	n/a	2	n/a	8	Usually a busy room, with a lot of bustle going on or loud steady noises	1	2		n/a	Abrupt conversation or refocus on my work	1,2,3	n/a	To study what triggers ASMR in multiple people	509241
1	1177	2	1	18	1	1	1	1	304.832	304.832	306.114	1	1	319.816	319.816	320.917	1	2	303.596	303.596	305.472	1	N/A	N/A	Vyvance for ADD	2	N/A	8	N/A	2	3		N/A	N/A	11	N/A	To see what makes people experience ASMR	23513
1	1217	2	1	19	1	1	1	1	315.297	315.297	317.552	1	1	302.5	303.356	304.488	2	1	303.318	303.318	305.23	1	N/A	N/A	N/A	2	N/A	8	N/A	2	3		N/A	N/A	11	N/A	To see what noises could give someone that cool feeling you get when you hear a good new song or at other times.	526564
1	1204	2	1	20	1	1	1	1	225.455	225.759	303.388	2	1	92.81	256.313	307.238	4	3	304.311	304.311	305.051	1	N/A	N/A	N/A	2	N/A	8	N/A	2	3		N/A	N/A	1	N/A	To find out why ASMR occurs in individuals and how it does	854277
1	1247	2	1	18	2	1	1	7	287.384	287.384	309.556	1	1	154.004	154.004	303.447	1	3	198.6	198.6	307.612	1	N/A	N/A	N/A	2	N/A	8	N/A	1	3	2,4,9	N/A	N/A	1	N/A	To figure out what triggers ASMR	12462
1	1323	2	1	19	1	2	1	6	310.501	310.501	314.99	1	1	305.061	305.061	306.83	1	1	170.348	170.348	368.314	1	N/A	N/A	N/A	2	N/A	8	N/A	2	3	2,3,10	N/A	N/A	1	N/A	To get an idea of what triggers ASMR, why they trigger us, and what it means	705666
1	1193	2	1	19	1	2	1	1	307.187	307.187	321.083	1	1	253.777	253.777	313.069	1	1	304.493	304.493	311.601	1	N/A	N/A	N/A	2	N/A	8	N/A	2	3		N/A	N/A	11	N/A	I think the purpose of the study was to test a persons response to ASMR videos.	672752
1	193924	2	1	21	2	1	1	2	111.45	111.45	314.096	1	1	64.319	64.319	304.679	1	4	64.239	64.239	316.157	1	N/A	N/A	N/A	2	N/A	8	N/A	2	3		N/A	N/A	11	N/A	Determine if someone experiences ASMR and can pay attention to the clip long enough to rank sensation	638798
1	1488633	2	1	19	2	2	1	2	307.121	307.121	308.135	1	3	314.536	314.536	315.347	1	2	321.597	321.597	322.602	1	N/A	N/A	N/A	2	N/A	8	N/A	1	3		N/A	N/A	11	N/A	To find out how many people experience ASMR and how.	967460
1	1192	2	1	21	2	3	1	2	320.061	320.061	321.226	1	2	306.118	306.118	306.922	1	5	306.027	306.027	306.92	1	N/A	N/A	N/A	2	N/A	8	N/A	2	3		N/A	N/A	11	N/A	To identify what aspect of the audio clips might be the trigger for an ASMR sensation and why this may be	962465
1	1166	2	1	19	1	1	1	6	298.946	303.034	304.757	2	2	342.292	342.292	343.204	1	4	241.65	241.65	303.544	1	N/A	N/A	N/A	2	N/A	8	Quiet room, dark lighting	1	1	1,2,3,4	N/A	Anything unrealistic	1,2	N/A	Effects of ASMR	161323
1	1290	2	2	19	2	1	1	2	15.603	218.428	308.408	3	3	46.509	119.493	304.025	2	2	1.631	301.855	302.344	4	N/A	N/A	Yes; I have Type 1 Diabetes, so I take insulin daily.	2	N/A	8	N/A	1	1	1,2,3	N/A	If the stimulus causing the tingling is constant, then it stops.	2,4,5,9	N/A	To find the similarities of all 3 ASMR videos and see how some with certain characteristics compare in reaction to others.	744440
1	3158	2	2	19	2	1	1	5	99.236	266.015	311.043	3	4	199.698	263.476	305.479	2	3	309.89	309.89	326.022	1	N/A	N/A	N/A	2	N/A	8	N/A	1	1	1,2,6	N/A	N/A	5	N/A	I think he purpose of this study was to learn what sounds trigger certain people's stimuli.	455124
1	1078	2	2	18	2	1	1	1	65.085	65.085	306.591	1	4	142.968	307.669	308.191	3	2	76.971	218.211	313.425	2	No	No	NuvaRing	2	N/A	8	N/A	2	3		N/A	N/A	11	N/A	To see how ASMR clips affect different people	940753
1	1720	2	2	20	1	1	1	5	113.768	302.307	303.372	6	3	42.892	327.951	328.963	4	5	74.246	274.175	328.552	2	N/A	N/A	N/A	2	N/A	8	N/A	2	1	1,7,8	Music that involves bells.	N/A	2,3	N/A	To determine what type of sounds would produce ASMR tingling sensations. Also, most likely, to see if race or sex influence what types of sounds stimulate the autonomic nervous system, causing it to produce such tingling sensations. I would imagine that the first clip involved heavy bass to stimulate sensations, because it in a way, mimicked the heartbeat. The second perhaps may remind the listen…	650351
1	1281	2	2	18	2	2	1	1	147.049	206.407	441.981	7	1	78.442	78.442	303.127	1	2	15.514	75.98	304.215	2	N/A	N/A	HYDROXYUREA, FOLIC ACID, BIRTH CONTROL	2	N/A	8	N/A	2	3		N/A	N/A	11	N/A	To see if students have a tingling sensation from listening to ASMR clips and to see the effects it has on others with ASMR	734043
1	1153	2	2	18	2	1	1	2	315.023	315.023	315.825	1	1	307.888	307.888	309.252	1	2	311.922	311.922	312.935	1	N/A	N/A	N/A	2	N/A	8	N/A	2	3		N/A	N/A	11	N/A	I think it was to measure how different people react to the ASMR sound and feeling. I was definitely one of those who do not react much to them.	850618
1	1100	2	2	22	2	1	1	6	75.189	75.189	304.046	1	3	271.708	271.708	303.193	1	5	33.082	219.778	304.193	6	N/A	N/A	N/A	2	N/A	8	N/A	2	2		N/A	N/A	11	N/A	I have no idea.	598655
1	1725	2	2	20	2	2	1	3	138.765	162.957	303.577	6	2	188.785	188.785	303.703	1	2	172.083	172.083	303.009	1	N/A	NN/A	N/A	2	N/A	8	N/A	2	3		N/A	N/A	11	N/A	To tests Tendencies of ASMR	744796
1	1234	2	2	21	2	2	1	4	9.786	273.755	305.213	2	2	163.538	163.538	303.198	1	5	318.28	318.28	320.082	1	I have asthma	N/A	Levora, Singular, Hair skin and nails	2	N/A	8	N/A	2	3		N/A	N/A	5	I have heard the beating of the pen.	The purpose of this study is to stimulate ASMR without the visual sense	336095
1	1274	2	2	21	2	1	1	1	248.468	248.468	302.996	1	1	202.001	248.128	309.877	3	6	225.695	304.527	305.864	3	N/A	N/A	MonoNessa, birth control	2	N/A	8	N/A	2	3		N/A	N/A	5	N/A	To find out what kind of noises stimulate people.	818882
1	1163	2	2	22	1	1	1	2	144.158	152.397	308.068	3	3	232.97	304.33	304.946	2	1	142.347	235.517	304.111	3	N/A	N/A	N/A	2	N/A	8	N/A	1	1	1	N/A	Shift in concentration	1,2,4,9	N/A	To assess the triggers of an ASMR response	866026
1	1202	2	3	19	2	1	1	1	306.291	306.291	307.242	1	2	313.287	313.287	314.2	1	1	330.304	330.304	331.5	1	N/A	N/A	N/A	2	N/A	8	N/A	2	3		N/A	N/A	11	N/A	to find people who experience ASMR and understand why it occurs and where on the body	942024
1	1369	2	3	18	2	1	1	1	308.439	308.439	319.911	1	4	322.012	322.012	322.945	1	1	310.587	310.587	318.987	1	ADHD	yes, in the first one i was picturing brow or tan shapes then in the second one i was picturing light colors and in the last one i was picturing outer space type of look	im in focline	2	N/A	8	N/A	2	3		N/A	N/A	11	N/A	to see how different people react to different ASMR sounds	454767
1	1093	2	3	19	2	2	1	2	218.041	218.041	302.855	1	6	28.801	45.577	304.826	2	5	163.998	163.998	304.313	1	N/A	N/A	N/A	2	N/A	8	N/A	2	3	1	N/A	N/A		N/A	To see if we heard or felt a sound while listening to the different audio clips	62348
1	3277	2	3	21	2	1	1	7	9.547	61.867	301.679	2	3	33.017	240.754	317.724	3	2	198.718	228.822	312.065	3	N/A	N/A	yes, ADHD (vyvance)	2	N/A	8	N/A	2	3		N/A	N/A	11	N/A	To determine what age group and gender experiences more ASMR and to what degree they experience it	998999
1	1259	2	3	19	2	1	1	4	303.273	303.273	315.777	1	2	316.483	316.483	318.152	1	1	314.805	314.805	316.404	1	N/A	N/A	N/A	2	N/A	8	N/A	2	3		N/A	N/A	11	N/A	I think the purpose was to see if certain sounds triggered some people's sensations more than others.	146383
1	1097	2	3	20	2	1	1	2	315.032	315.032	315.985	1	1	309.041	309.041	310.458	1	3	307.362	307.362	308.325	1	N/A	N/A	N/A	2	N/A	8	N/A	2	3		N/A	N/A	11	N/A	To determine how different videos caused ASMR effects	779926
1	1213	2	3	22	2	2	1	1	130.075	130.075	303.995	1	2	134.5	134.5	304.457	1	1	121.948	121.948	303.296	1	N/A	N/A	N/A	2	N/A	8	N/A	2	3		N/A	N/A	4	N/A	To determine if being told that a specific sound does not show signs of ASMR would cause the person to not feel the tinging sensation.	780877
1	89941	2	3	22	2	1	1	5	307.205	307.205	308.301	1	5	337.406	337.406	339.767	1	6	205	210.292	584.43	2	N/A	N/A	Yes, skin and allergy medication	2	N/A	8	N/A	2	3		N/A	N/A	11	I had heard the piano one (the first one played).	To see people's reactions to certain types of sound to trigger something in them and if they experience Synaesthesia.	408546
1	1141	2	3	19	2	1	1	5	124.546	168.794	303.634	2	2	101.439	101.439	302.904	1	1	31.449	31.449	303.295	1	n/a	n/a	n/a	2	n/a	8	n/a	2	3		n/a	n/a	11	I had heard the piano part, but that is pretty common.	Possibly to educate about ASMR, but to be honest I am not really sure.	187323
1	4354	2	3	18	2	1	1	1	307.351	307.351	309.543	1	1	310.318	310.318	311.644	1	2	317.593	317.593	319.101	1	n/a	n/a	n/a	2	n/a	8	n/a	2	3		n/a	n/a	11	n/a	To see if any of the sound clips triggered ASMR	399013
1	1121	2	3	20	2	1	1	5	305.625	305.625	306.936	1	4	304.74	304.74	305.57	1	3	313.771	313.771	314.716	1	N/A	N/A	N/A	2	n/a	8	na	1	2	1,2	n/a	n/a	1,5	n/a	To see what type of sounds trigger ASMR	455422
1	3485	2	4	19	2	1	1	1	12.587	272.441	302.963	2	1	15.952	173.809	305.511	2	1	302.573	302.573	303.727	1	N/A	N/A	N/A	2	N/A	8	N/A	2	3		N/A	N/A	11	N/A	To test stimulations and ASMR	583602
1	3108	2	4	19	2	1	1	2	310.315	310.315	311.353	1	1	305.592	305.592	306.804	1	1	310.682	313.231	364.251	2	N/A	N/A	N/A	2	N/A	8	N/A	2	3		N/A	N/A	11	N/A	I think the purpose of this study was to test which clips cause subjects to experience ASMR, which is a "tingling, static-like" sensation. After this was tested, a survey was conducted with the purpose of looking into one's background of dealing with ASMR, which could explain why subjects did or did not feel the tingling sensation.	75411
1	1214	2	4	20	2	2	1	3	284.119	284.119	304.362	1	1	38.54	58.253	315.225	2	2	290.463	290.463	305.86	1	N/A	N/A	N/A	2	N/A	8	N/A	2	3		N/A	N/A	11	N/A	To see how many people experience ASMR.	541641
1	1281	2	4	22	1	4	1	3	303.143	303.559	313.217	2	1	24.769	302.873	304.096	3	1	307.586	307.586	308.656	1	N/A	N/A	N/A	2	N/A	8	N/A	1	1	1,2,3	N/A	N/A	2,4	I have heard the Deadmau5 song before.	To see how many people are getting ASMR and which part of the body it originates from.	210985
1	1120	2	4	19	2	3	1	6	303.857	305.825	307.107	2	1	292.091	292.091	303.581	1	3	320.441	320.441	321.658	1	N/A	N/A	N/A	2	N/A	8	N/A	2	3		N/A	N/A	11	N/A	I think the purpose was to test our hearing and see if we can pick up on certain things when we are listening to something	88930
1	1175	2	4	18	2	4	1	1	77.726	78.38	302.791	2	1	10.663	11.937	307.85	2	1	44.106	44.106	302.895	1	N/A	N/A	N/A	2	N/A	8	N/A	2	3		N/A	N/A		N/A	We were told that the purpose of today's study was to listen to clips and then answer questions on whether or not we felt the ASMR sensation. I think that the study was also supposed to see if we were paying attention in the studies because in all 3 of my videos, it said that this video does not show signs of causing an ASMR sensation.	802089
1	1097	2	4	27	2	1	1	2	318.103	318.103	319.186	1	1	304.012	304.012	306.842	1	1	71.438	260.029	319.402	5	n/a	n/a	n/a	2	n/a	8	n/a	2	3		n/a	n/a	11	n/a	To determine how people experience ASMR.	378107
1	2014	2	4	19	1	3	1	1	306.64	306.64	307.679	1	1	307.209	307.209	308.839	1	1	321.804	321.804	323.414	1	N/A	N/A	N/A	2	N/A	8	N/A	2	3		N/A	N/A	11	N/A	Maybe to test the stimulation of certain sounds.	721537
1	1271	2	4	19	2	1	1	1	289.877	289.877	313.726	1	1	423.174	423.174	429.121	1	1	304.285	305.857	306.665	2	N/A	N/A	N/A	2	N/A	8	N/A	2	3		N/A	N/A	11	N/A	to test if these clips produced ASMR	954402
1	2023	2	4	19	1	1	1	1	304.611	304.611	306.239	1	1	309.599	309.599	311.232	1	1	303.956	303.956	305.25	1	N/A	yes	es	2	N/A	8	N/A	2	3		N/A	N/A	11	N/A	to find out if people can be affected by sounds in unusual ways	734510
1	1221	2	4	21	1	1	1	1	309.806	309.806	310.93	1	1	305.339	305.339	306.946	1	3	276.693	293.15	309.343	5	N/A	N/A	N/A	2	N/A	8	Usually a busy oom	1	1	5,6	Car engine	N/A	1	N/A	To see if we experience ASMR with certain sounds and to see what triggers individuals to feel these sensations	342302
1	1387	2	5	20	1	1	1	2	309.801	309.801	314.968	1	3	160.557	160.557	306.464	1	1	307.099	307.099	310.093	1	N/A	N/A	N/A	2	N/A	8	N/A	2	3		N/A	N/A	11	N/A	I think the purpose was to see if these noises caused tingling. At times I felt a slight tingle but I'm not sure if it was from the noises or from sitting for too long.	771753
1	3097	2	5	19	2	1	1	1	304.22	304.636	305.648	2	1	136.242	258.522	304.007	3	2	326.019	326.019	327.287	1	n/a	n/a	vyvanse	2	n/a	8	n/a	2	3		n/a	n/a	11	n/a	memory	570829
1	3053	2	5	20	1	1	1	4	296.517	296.517	301.708	1	1	300.591	300.591	302.223	1	1	303.846	303.846	304.93	1	N/A	N/A	adderall	2	N/A	8	N/A	1	1	2	N/A	N/A	1	N/A	I think the purpose was to see if certain noises can stimulate different parts of the brain to induce a response felt around the body.	495946
1	6955	2	5	21	2	1	1	2	312.311	312.311	313.564	1	1	308.025	308.025	310.693	1	2	313.705	313.705	314.886	1	Chronic knee pain (chondromalacia patella syndrome)	N/A	Yes- Mirena, Klonopin, Allergy medication (don't know the name, nasal spay), prozac	2	N/A	8	N/A	1	1	1,4	N/A	N/A	1,2,4,5,6,7	N/A	To try to understand what sounds induce ASMR?	316576
1	1056	2	5	19	2	1	1	2	107.589	107.589	302.001	1	1	231.466	231.466	302.607	1	1	101.015	101.015	303.827	1	N/A	N/A	N/A	2	N/A	8	N/A	2	3		N/A	N/A	11	N/A	To see which sound clips induce ASMR	951616
1	1167	2	5	20	2	1	1	2	53.016	53.016	302.71	1	7	18.098	75.889	304.349	9	2	267.596	268.212	303.707	3	N/A	N/A	birth control	2	N/A	8	N/A	2	3		N/A	N/A	5	N/A	To see which stimulus gave the most effect to college age students	521102
1	1243	2	5	20	2	1	1	1	306.445	306.445	307.337	1	2	301.658	301.658	304.513	1	1	316.407	316.407	317.543	1	N/A	N/A	N/A	2	N/A	8	N/A	2	3		N/A	N/A	11	N/A	I believe the purpose of this study was to collect information on the effectiveness of ASMR videos to actually trigger stimuli in the person listening to them. Perhaps this is to study whether or not the effects of ASMR videos are all in participants' heads.	514676
1	1162	2	5	20	2	1	1	1	305.11	305.11	306.629	1	1	303.007	303.007	305.171	1	2	305.001	308.537	309.606	3	N/A	N/A	N/A	2	N/A	8	N/A	2	3		N/A	N/A	11	N/A	To see what types of sounds induce ASMR, whether it's music, or screaming, or a soothing voice.	844450
1	1231	2	5	21	2	2	1	1	304.783	304.783	310.156	1	1	305.233	305.233	306.248	1	1	304.263	304.263	308.547	1	anxiety	n/a	lexapo	2	n/a	8	n/a	2	3		n/a	n/a	11	n/a	i guess the purpose was to survey individuals on their asmr triggers	724551
1	1240	2	5	19	2	1	1	2	149.434	264.866	311.771	2	1	29.273	296.761	302.371	3	3	287.236	287.236	331.384	1	N/A	N/A	Lomedia	2	N/A	8	N/A	2	3		N/A	N/A	11	N/A	To determine if people experience ASMR, when and where they experience it, and what triggers the experience.	20693
1	1183	2	5	19	1	2	1	1	165.222	165.222	311.036	1	3	67.9	235.275	304.178	2	3	197.251	197.251	307.391	1	N/A	N/A	N/A	2	N/A	8	Yes,Scratchy noises	2	1	1	N/A	N/A	1	The screams sound like there in a lot of movies.	To be honest, I don't know.	315136
2	1559	1	1	26	1	1	1	3	309.533	309.533	310.596	1	1	311.072	311.072	312.076	1	1	521.528	521.528	522.487	1	no	no	no	1	6	5	Headphones with surround sound, quiet room, to be left alone.	1	1	2,4,8,10	Light tracking, medical/examination, a specific type/level of camera hiss, held eye contact, long pauses.	Sharp noises (mic pop, sound blow out), cringey performance, unnatural sounds (e.g. if the sound of an action sounds "forced")	1,2	Possibly number 2. "Allie".	To get a baseline on who experiences ASMR (age, race, gender etc). Would like to point out that the first clip may not necessarily be asmr and could possibly be confused with frisson.	867078
2	1256	1	1	26	2	1	1	5	309.214	317.977	320.762	8	1	265.834	310.941	311.64	7	2	307.102	309.087	309.826	3	Yes, migraines, endometriosis, interstitial cystitis	N/A	Elmiron, Ranitidine, Cyproheptadine, Vitamins B and D, probiotics	1	5	4,5	N/A	1	1	1,2,3,4	N/A	Sudden loud noises	1,2,9	N/A	To determine if most people who experience ASMR have similar triggers	176201
2	1287	1	1	31	1	1	1	7	4.959	305.753	308.405	5	1	105.476	306.936	308.181	24	3	313.351	316.019	319.036	4	N/A	N/A	N/A	1	2 or 3	1,4,6	Have to be queit, relaxed	1	1	1,2,4	N/A	Tapping noises usually	1,2	N/A	See which types of audio give the largest reaction	444954
2	1274	1	1	13	1	1	1	1	162.34	371.122	373.114	4	1	97.237	97.237	316.585	1	1	29.585	30.274	304.304	2	N/A	N/A	N/A	1	1-4 depending on length	6	N/a	2	3		N/A	N/A	11	N/A	I think the purpose of this study was to find out how different stimulants affect the brain and cause ASMR. I think each audio clip affected different areas of the brain.	748861
2	1462	1	1	16	1	1	1	2	3.075	331.852	333.472	2	1	188.181	318.511	319.293	4	1	222.862	415.726	416.574	3	N/A	N/A	N/A	1	4	6	N/A	1	1		N/A	N/A	1	the first one i recognize as a video made by ASMRrequests, I do not know the other one's however.	to see what the most common types of asmr are and see the variety that this community has.	355894
2	1188	1	1	28	2	1	1	5	320.135	321.909	322.82	5	1	289.193	302.984	305.719	5	3	302.103	305.724	308.537	3	Celiac, endometriosis, pcos	N/a	N/a	1	2	6	N/a	1	1	1,2,4,9,10	N/a	Focusing too hard on the sensation. Being nosed around or walked on by my cat.	1	Clip 2/ asmrrequests	To determine asmr causes and sensations.	920904
2	1486	1	1	19	1	1	1	3	9.457	316.921	317.796	8	1	314.753	315.531	317.093	3	1	6.212	314.904	315.945	12	N/A	N/A	N/A	1	2	6	Quiet room, few distractions	1	1	1,3,4	N/A	N/A	2,4	N/A	To find out more about ASMR and how it affects different demographics in different ways.	959241
2	2492	1	1	26	2	1	1	3	321.193	321.193	322.27	1	1	146.801	146.801	341.524	1	1	305.95	306.337	308.971	2	N/A	N/A	N/A	1	one or two	5,6	Not too much noise around me. Being a bit tired seems to help.	1	1	4	Hand movements, ear to ear sounds/talking.	mouth sounds, crinkling, latex gloves	1	I've heard the first clip before.	To learn more about what types of sounds can trigger ASMR	320057
2	1957	1	1	23	2	1	1	4	103.358	220.7	537.309	8	2	248.183	248.183	317.582	1	2	322.145	322.145	324.897	1	dysmenorrhea, depression	occasional tasting colors, association with touch and sound (which may be painful or pleasant)	N/A	1	2	6	quiet room	1	1	3,4,9,10	soft spoken voices, hearing a specific place described	distractions such as lots of people around me	1,2,4	N/A	Evaluate how people respond to and use ASMR media	468811
2	1095	1	1	24	2	1	1	3	308.127	309.121	309.764	3	1	219.953	310.091	311.02	3	2	309.627	310.247	311.173	2	n/a	n/a	n/a	1	2017-03-05	6,7	n/a	1	1	4,9	soft speaking, brushing sounds	n/a	1	clip #3	understand asmr and the conditions/sounds that trigger it	9789
2	1641	1	1	27	2	1	1	3	307.425	307.425	313.728	1	1	321.214	321.214	322.622	1	1	311.602	311.602	313.339	1	n/a	n/a	n/a	1	5	6	n/a	1	1	1,4,10	n/a	n/a	1	clip 1	n/a	816458
2	2599	1	2	42	1	1	1	4	116.354	305.089	306.097	9	3	8.223	306.515	307.333	4	4	1170.14	1187.71	1384.56	9	N/A	N/a	Tecta, coversyl, rovusostaten, singulair	1	2	3,4	N/A	1	1	4,10	Soft speaking, grooming	N/A	1,2,3,4	N/A	To determine common triggers, and their effectiveness.	130983
2	1926	1	2	42	1	1	1	3	336.464	336.464	343.334	1	2	309.928	310.992	315.977	2	1	311.077	311.077	314.418	1	N/A	N/A	N/A	1	3	6	eyes closed, in bed	1	1	1,2	paper sounds (writing, drawing, rustling), computer keyboard typing	N/A	1,4,5	N/A	finding individual causes and expressions of ASMR	565849
2	1829	1	2	19	1	1	1	5	2.669	163.851	310.967	5	4	9.209	422.313	425.493	22	1	3.986	365.124	808.852	7	N/A	N/A	N/A	1	1	6	it should be silent around me	1	1	1,2	N/A	N/A	1,4	N/A	Determining patterns that cause ASMR.	259816
2	1650	1	2	33	1	1	1	5	10.112	103.806	311.363	2	4	306.82	576.854	579.025	2	2	7.614	240.948	312.134	6	N/A	Very mildly percieve flavours as having a musical pitch, though I don't actually hear it e.g. salt is high pitched	N/A	1	2017-05-10	7	N/A	1	1	1,2,4,9,10	Soft speaking, sounds of brushes	Mouth sounds	1,2,3,4,5,6	N/A	To better understand ASMR, and investigate some possible causes.	180790
2	11829	1	2	18	1	1	1	2	335.159	335.159	336.127	1	4	253.028	279.353	10029	3	1	310.264	310.264	311.086	1	N/A	N/A	N/A	1	2017-01-02	4,6	Quiet room	1	1	1,2,4	Mic Brushing/Touching, Hand Movements	Any stimuli that doesn't normally trigger me will stop the tingling.	1	The first clip sounded generic, but the other two were unique to me. The second clip gave me a lot of tingles, and the last one did nothing.	To learn more about ASMR.	457667
2	5903	1	2	27	1	1	1	5	3.134	132.564	369.203	22	2	5.668	261.587	330.157	22	1	12.503	410.787	711.611	56	N/A	N/A	N/A	1	3	3,6	N/A	1	1	1,2,4,10	N/A	N/A	1	N/A	Whether ASMR can be achieved using rhythmic stimulus	542008
2	1350	1	2	21	1	1	1	4	4.687	215.617	308.163	8	7	3.971	301.011	585.628	27	2	7.659	300.91	303.359	12	N/A	N/A	N/A	1	2	6	N/A	1	1	1,2,3,4,10	N/A	N/A	1,2	N/A	To study asmr	93013
2	1559	1	2	23	1	1	1	6	5.552	314.964	317.292	10	1	0.427	313.018	313.08	8	2	15.593	531.56	533.131	55	N/A	N/A	N/A	1	2017-01-04	6	N/A	1	1	1,2,4,10	Roleplays	N/A	1,4	N/A	Have no answer	535957
2	1674	1	2	34	1	1	1	4	314.394	318.978	320.315	6	4	307.682	318.232	320.426	9	2	9.749	329.419	330.322	6	N/A	I have the ability to transfer aesthetics of senses onto different senses, but I have no Diagnose of synaesthesia.	N/A	1	2	3,4,5	N/A	1	1	1,4,10	Light slowly shined from the outside of the video coming inside the video screen. Damp knocking sounds. Concentration of performer on sound generating object.	Bad sound quality, too much background noise.	1,4	N/A	Finding different mechanics for asmr	555823
2	1145	1	2	29	1	1	1	3	5.112	293.765	304.344	8	2	7.243	265.939	304.607	5	1	8.754	302.387	304.808	18	N/A	N/A	N/A	1	6	5,6	N/A	1	1	1,2,4	Woo	Loud noises	1,2,5,8	N/A	If ASMR is real	22087
2	1313	1	3	24	1	1	1	4	264.888	264.888	310.598	1	1	67.165	72.086	354.961	4	1	308.979	308.979	309.851	1	N/A	N/A	N/A	1	2017-03-06	5,6	dark room, relaxed state of mind	1	1	1,2,4,8,9,10	Esthetics i.e. painting, sculpting etc.	Music	1,2,4,5,6,9	N/A	To find out what kind of stimuli might trigger ASMR in different subjects however I would've controlled for music as music triggering this feeling is more commonly associated to "frission"	376943
2	1255	1	3	32	2	1	1	4	245.179	303.194	305.997	5	1	259.345	307.033	308.089	4	1	339.688	339.705	341.543	2	N/a	N/a	N/a	1	3	5,6	Quiet, dimly lit room	1	1	1,4	N/a	Mouth sounds like chewing or lip smacking	1	N/a	To figure out what causes asmr	309437
2	1521	1	3	18	1	1	1	2	116.372	116.375	312.315	2	1	165.999	166.74	306.044	4	1	32.32	32.32	306.692	1	N/A	N/A	N/A	1	2	6	N/A	1	1	1,2,4,9,10	Frequent variation in sounds and visuals (by that I mean, frequently switching between different triggers), being surpised by a video (e.g. quickly switching to a different voice direction)	Sudden loud noises, music (except for very simple background tracks),	1,2,4,5,6	N/A	To see if people taking an ASMR survey make any attempts to skip though 5 minute audio clips that don't produce ASMR in the slightest	557351
2	1311	1	3	21	1	1	1	2	2.725	260.401	307.45	3	1	2.746	115.278	306.043	11	1	3.296	281.495	306.919	4	I work at a very physically demanding place, so yeah, my back and hands hurt quite often.	N/A	N/A	1	Almost always between 1-3 before I find the one that I wanna doze off to.	6	Setting isn't very important, but I need good headphones. If the audio's not crisp it just doesn't work for me.	1	1	2,4,8,10	The sound of leather moving (like a leather jacket, pants, etc.)	High pitched or sharp sounds. The sound of plastic crinkling is very annoying to me, as is the high-pitched squish of someone chewing gum or eating food.	1,2,4,9	N/A	Seems like you're seeking general knowledge of ASMR, who it effects, and what kind specifically triggers those peoples' ASMR. The questions about pain and synesthesia seem a bit out of left field, but it's not my study!	263453
2	6491	1	3	17	1	1	1	2	8.289	5262.45	5263.06	3	1	512.489	512.489	513.506	1	2	8.246	250.128	524.545	8	N/A	N/A	N/A	1	1	4,5,6	N/A	1	1	2,4	mouth sounds :3c	N/A	1	N/A	There was no purpose.	964473
2	1699	1	3	26	1	4	1	4	336.343	336.343	340.667	1	2	307.271	308.195	309.389	2	4	308.513	308.513	309.793	1	N/A	As a dancer and musician, I can feel textures in musicality.	Party drugs	1	4 to 5	6	N/A	1	1	1,2,3,4,9,10	Explanations, story telling	Loud noises interrupt from a state of trance	1,2,4	N/A	To see if sound clips labeled as ASMR can produce false positives.	954423
2	1923	1	3	18	1	1	1	5	305.054	305.054	305.742	1	1	400.086	400.086	400.976	1	1	9.252	123.18	303.542	5	N/A	N/A	N/A	1	3	5,6	When watching an ASMR video, I need my surroundings to be completely dark and completely silent. If I'm experiencing ASMR in real life with no video, I can be in almost any conditions.	1	1	2,8,9,10	Writing on paper, people doing routine things in the background noise (washing hands, brushing teeth)	Any fast, loud, rough, or otherwise extreme stimuli. I prefer things to be mellow, peaceful, and quiet	1,2,4	N/A	To figure out whether ASMR really exists or if it is just some sort of placebo effect. Also to figure out what triggers it if it really does exist.	663637
2	1189	1	3	34	1	1	1	4	145.587	145.587	325.583	1	1	10.702	10.702	304.751	1	1	42.276	42.276	312.698	1	N/A	N/A	N/A	1	1	6	headphones, dim lighting	1	1	2,4,10	microphone brushing, scalp/head massage	sudden loud noises	1,2,4	N/A	Trying to link ASMR to frission	211018
2	1350	1	3	47	1	1	1	2	315.676	321.822	331.424	3	2	318.98	318.98	321.365	1	2	306.717	306.717	312.794	1	N/A	N/A	N/A	1	3	6	quiet room; dim lights	1	1	2,4,8	mic brushing	Tapping and loud mouth sounds kill it for me	1	N/A	don't know; don't care	788784
2	1302	1	3	44	2	1	1	1	5.596	310.94	313.265	2	1	8.989	154.695	322.872	2	1	3.997	273.338	310.402	2	n/a	n/a	yes	1	3 to 4	3	I need a quiet space with no other sounds	1	1	2,4,10	Quiet talking in my ear, medical exam roleplays	Tapping sounds, loud scraping noises	1,4,9	n/a	To see how many people you could get to sit through that piano clip all the way to the end.	323680
2	1291	1	4	33	2	1	1	7	309.818	309.818	311.062	1	2	307.643	307.643	308.802	1	1	313.287	313.287	315.291	1	N/A	N/A	Allergy meds, asthma inhaler, BC	1	1. I prefer longer videos and fall asleep during them.	6	N/A	1	1	1,2,4,10	Hair brushing, Reiki, any kind of 'Woo ASMR' like crystals/aura reading/chakra, Ear cleaning, Korean, New Age Healing, Steam noises	Mouth noises.	1,2,4	N/A	Maybe to see what type of people (age/sex) are into certain kinds of ASMR? I think women are probably more into personal care types, but I don't know anyone else that has it so I can't ask.	231064
2	1490	1	4	40	1	1	1	1	6.887	310.054	312.12	2	2	9.936	314.185	315.611	3	1	6.653	413.593	414.871	2	N/A	N/A	Bystolic 5 mg, Omeprazole 30 mg	1	3	5,6	quiet room so I can hear the binaural stimulation	1	1	1,2	soft sounds moving into my right ear	loud or percussive sounds or static make it difficult to trigger off softer sounds for a while	1,4	N/A	Graduate thesis? The first clip at least was so far outside the range of what typical ASMR videos contain that it could have been meant to see if it messes up future triggering, as it might have for me for tonight.	45029
2	1116	1	4	17	1	1	1	1	201.629	256.03	303.203	2	1	122.846	122.846	304.56	1	2	271.918	294.11	306.726	4	N/A	N/A	N/A	1	3	6	N/A	1	1	2,4,10	N/A	Loud noise, anything scary	1	N/A	I don't really know, but i'm glad I can help	186873
2	2019	1	4	23	1	1	1	6	305.396	305.396	307.859	1	1	321.027	321.027	322.589	1	3	310.601	310.601	312.433	1	N/A	N/A	Sertralin 100 mg, Methylphenidate Actavis 54 mg, Motiron 10 mg	1	2017-02-03	5,6	N/A	1	1	4,9,10	People writing with pen and paper. Deep low volume rumbling sounds (Such as the movement of large masses of ice)	Loud noise, unexpected touch.	1,2,4	N/A	To collect personal info that you can then sell to companies. Or, to furter our understanding of what ASMR is and how it works so that advertisement companies can inevitable use it to manipulate people into buying more stuff we don't need. Or maybe because, let's face it, it's a bit weird.	528921
2	1815	1	4	27	1	6	1	2	3.54	305.668	306.588	4	1	2.638	212.471	303.467	9	2	5.538	353.625	355.205	18	N/A	N/A	N/A	1	4	7	N/A	1	1	1,2,3,4,10	N/A	N/A	1,2,4	N/A	N/A	543424
2	1150	1	4	22	2	1	1	4	305.686	305.686	306.891	1	1	8.14	191.877	313.351	3	4	303.572	303.572	304.976	1	depression	n/a	meds for my depression.	1	4	7	n/a	1	1	1,2,3,5,7	n/a	latex gloves	1,2	n/a	how asmr affects people with chronic pain and illnesses vs other people?	103694
2	1277	1	4	27	1	1	1	4	4.511	304.892	305.867	2	3	5.709	307.192	308.741	2	2	4.636	290.347	302.286	2	n/a	n/a	n/a	1	2017-02-03	5,6	relatively quiet room, need darkness for visual triggers on computer screen	1	1	1,2,4,9	metallic sounds	loud noise	1,4	n/a	beyond furthering understanding of asmr, I can't really tell. Your audio choices do seem quite different from most of what the YouTube asmr community puts out though.	209962
2	1466	1	4	31	1	3	1	1	5.842	308.739	309.903	2	1	8.189	310.212	311.401	2	1	11.28	18.554	313.642	2	N/A	N/A	N/A	1	2017-05-06	2,5,6,7	N/A	1	1	1,2	Brushing, kissing, windscreen touch	Loud volume, background music	1	N/A	.	695983
2	1712	1	4	28	1	1	1	1	308.756	309.49	311.027	2	1	756.711	756.711	757.891	1	1	309.084	309.084	311.493	1	Migraines	N/A	N/A	1	1	6,7	N/A	1	1	2	N/A	Loudness	1,4	N/A	Generate summary data about how ASMR is experienced.	28997
2	1222	1	4	20	1	1	1	1	283.545	283.545	303.87	1	1	284.22	284.22	306.412	1	1	45.301	45.301	412.147	1	N/A	N/A	N/A	1	2	6	Quiet room	1	1	1,2,4,8,9,10	Soft Speaking	N/A	1	N/A	To troll everyone because none of those clips are remotely ASMR	134091
2	1078	1	5	23	1	1	1	4	170.002	170.99	304.856	2	1	36.755	36.755	311.173	1	1	74.24	76.542	310.336	2	N/A	N/A	N/A	1	2 or 3	5,6	N/A	1	1	1,4	Foreign languages.	N/A	1,2,4	N/A	To gauge ASMR reactions.	580678
2	3654	1	5	16	1	3	1	3	312.462	313.022	458.769	2	1	65.792	368.325	647.642	24	4	296.292	296.292	306.251	1	N/A	N/A	N/A	2	N/A	8	N/a	1	1	2,4,7,8,10	N/A	Interruptions in general	2	N/A	To collect data for further research in the ASMR field due to it not having much info or data	85418
2	1619	1	5	39	1	1	1	5	7.529	312.767	313.647	28	1	31.969	474.066	476.57	79	2	5.599	295.727	303.104	17	N/A	N/A	N/A	1	2017-02-03	5,6	N/A	1	1	2,4,9,10	N/A	N/A	1	N/A	To evaluate participant response to a common set of clips to gauge ASMR response in a small set of people who self-identify as feeling the phenomenon.	333271
2	1102	1	5	28	1	1	1	2	277.948	277.948	306.687	1	5	68.661	68.661	342.033	1	1	73.869	73.869	307.943	1	n/a	n/a	n/a	1	3	5	n/a	1	1	1,4,9,10	binaural sounds moving from one ear to the other	n/a	1,2	n/a	To make me discover that I get ASMR from screaming. Weird.	831221
2	1323	1	5	26	1	1	1	3	311.592	311.592	312.795	1	1	19.752	215.141	250.299	7	1	311.613	311.613	312.88	1	N/A	N/A	N/A	1	10	3,5,6	I experience ASMR the best when it's accompanied by a light scratching on my head or back and in a setting devoid of other sounds. A good set of headphones does the trick to shut out any ambience.	1	1	1,2,3,10	N/A	Sometimes my ASMR response decides to hate mouth sounds (or maybe just excessive mouth sounds, I'm not sure). Sometimes mouth sounds either don't bother me or induce ASMR, but other times I have to turn the video off.	1,4	N/A, though I have previously listened to GentleWhispering (just not that specific clip)	To better understand different people's experience of ASMR and perhaps find a "baseline" to the sensation.	930466
2	1896	1	5	19	1	1	1	7	310.055	312.811	313.708	4	1	25.59	318.139	319.376	6	3	8.441	321.327	322.761	6	N/A	N/A	N/A	1	1	6	Quiet room, dark light	1	1	1,2,3,4,8,10	N/A	N/A	1,2,4	N/A	Finding common ASMR triggers	203209
2	1100	1	5	21	2	1	1	2	90.965	310.732	311.678	2	1	258.835	259.349	301.904	2	1	308.719	308.719	309.751	1	n/a	n/a	allergy medicine	1	2017-02-03	4,5,6	n/a	1	1	1,2,4	cat purrs	n/a	1,4	Not sure if I've heard the specific clip but I watch a lot of the videos by the creator of the first clip.	Determining what kinds of sounds trigger ASMR	223894
2	1063	1	5	24	1	1	1	5	312.45	313.754	314.42	2	1	8.076	8.641	308.483	2	1	317.085	318.083	318.654	2	N/A	N/A	Adderall	1	2017-02-03	6	no	1	2		NA	NA	1	NA	See if ASMR is uniquely tingley	299519
2	1777	1	5	21	2	1	1	6	3.667	306.442	307.536	21	1	12.364	294.322	302.212	4	1	50.648	854.369	855.387	10	N/A	N/A	N/A	1	2	5,6	Yes, quiet room darkness	1	1	1,2,4,9,10	Drawing and explaining things	Mouth sounds, loud jarring sounds	1,2	N/A	Learn more about asmr. The last two clips were strange, and not known as asmr in any community that I know of. So it seemed almost as a joke, or very unaware of asmr. The first, yes. But loud music and screaming? Not at all	773044
2	1113	2	1	30	1	1	1	5	312.736	312.736	314.099	1	1	321.117	321.117	322.388	1	1	313.574	313.574	314.728	1	N/A	N/A	N/A	1	4	5,6	I need a quiet environment where I can focus on the sounds.	1	1	1,3	N/A	N/A	1	N/A	Determining ASMR stimuli.	924964
2	2323	2	1	21	1	3	1	7	29.913	474.048	499.824	2	1	325.571	325.571	329.825	1	1	354.498	354.498	359.186	1	N/A	N/A	N/A	1	2	6,7	N/A	1	1	1,2,3,4	Tongue-clicky sounds, Ear cupping, Clicky sounds, Sound when cutting something with scissors	A rough, loud sound.	1,2,4,5	N/A	To get a clearer profile of the characteristics of people who get ASMR, and experience it regularly.	83571
2	1604	2	1	22	2	1	1	3	16.605	310.612	311.222	38	1	6.504	300.486	302.604	25	1	11.355	296.515	302.157	39	N/A	N/A	N/A	1	3	6	In bed, laying down, dark room, headphones(most important)	1	1	2,4,10	Brushing sounds(ear brushing, face brushing), tounge clicking, kissing sounds, some tapping	Any very loud sound, a person's voice that's unpleasant or annoying, harsh sounds(e.g. nails on a chalk board)	1	N/A	To figure out what sounds May prevent ASMR. Possibly what sounds May trigger it and learn about ASMR.	310643
2	1588	2	1	26	2	1	1	4	327.388	329.075	330.04	3	1	659.618	659.618	660.765	1	1	134.089	134.089	308.616	1	n/a	n/a	zyrtec 10 mg daily for allergies, lisinopril 10 mg daily for hypertension, biotin supplement and multivitamin daily as I remember	1	2 or 3	4,5,6	n/a	1	1	4,10	realistic role playing, soft-speaking, natural speech patterns that mimic real life	too quiet whispering, mouth noises (lip smacking, chewing, etc), unrealistic hand movements (tapping on a bottle for 60 seconds before you drink it, for example)	1,6	Yes, I had heard the first clip	I am honestly not sure.	12802
2	1591	2	1	23	1	4	1	7	313.915	313.915	314.999	1	1	7.604	318.842	319.117	6	1	368.419	368.419	369.213	1	N/A	N/A	N/A	2	N/A	8	can achive anywhere, but easier when in a calm place, confortable and possibily alone or with known people	1	1	1,2,4,9,10	accent and the strange gap in between words when someone is whispering (mouth touching sounds maybe)	N/A	1	N/A	What type of auditory stimulus triggers ASMR	777299
2	1473	2	1	25	1	1	1	2	144.722	319.101	321.714	22	1	310.864	312.863	313.999	4	1	285.562	306.515	307.901	6	N/A	N/A	N/A	1	5	6	N/A	1	1	1,2,4,9,10	Soft speaking	Background noise, sudden loudness	1	I recognized the Asmrrequests clip (the first clip)	To see if music or talking can elicit asmr?	801213
2	1442	2	1	27	2	1	1	3	308.319	308.319	312.29	1	1	315.009	315.009	316.721	1	1	310.692	310.692	311.836	1	N/A	Odd numbers are red/sharp, even numbers are blue/round.	N/A	1	1	6	N/A	1	1	1,2,3,4	Pen/pencil on paper	N/A	1	N/A	To see if telling someone that a clip did not induce ASMR affected how they responded to the clip.	432067
2	1304	2	1	25	2	1	1	7	302.697	302.697	304.331	1	1	303.1	303.1	304.492	1	5	313.056	313.056	315.732	1	Migraine	No	Beta Blockers	1	1	6	Dim lighting, cozy, quiet, alone	1	1	1,2,3,4	Anticipation	Loud, harsh noises. Shouting.	1	The final one from ASMRrequests	To see what makes people experience ASMR	922247
2	1394	2	1	19	1	1	1	3	232.572	232.572	317.229	1	2	86.567	257.165	303.258	3	1	188.133	188.133	348.9	1	Tinnitus. Nerve damage in one hand.	N/A	N/A	1	5	4,5,6	N/A	1	1	1,3	Brushing sounds, scratching sounds, sounds that smoothly transition from ear to ear.	N/A	1,4	I've heard the third clip, which I think is an ASMRrequests aesthetician roleplay.	I saw it on /r/asmr, so I assumed it was a study to study what clips cause ASMR. However, based on the structure of the questions, it seemed like you might also be investigating if saying that a clip has been shown to trigger ASMR influences the level of ASMR the listener experiences. There weren't enough questions to investigate that association, though, so it's probably just examining ASMR inte…	833264
2	1432	2	1	19	1	1	1	2	271.569	271.569	311.461	1	1	388.429	388.434	389.573	2	1	250.083	250.083	309.907	1	n/a	n/a	n/a	1	2-3 sometimes 4	5,6	no	1	1	1,2,4	n/a	loud/disruptive noise	1,4	n/a	To test which type of sounds tend to give people asmr and to see who watches asmr videos.	519728
2	4834	2	1	32	2	1	1	1	74.944	387.286	387.948	8	1	224.814	3750.67	3751.83	36	1	423.969	423.975	425.443	2	N/a	N/A	N/a	1	2	4,6	Cold room	1	1	2,4,10	N/a	N/a	4,9	N/a	To better understand the triggers of ASMR	133780
2	1460	2	1	31	1	1	1	5	300.717	300.717	305.993	1	2	302.444	304.057	310.285	2	2	310.434	310.434	312.458	1	migraine	na	na	1	2	6	na	1	1	2,4,9	Human interaction, for example a doctor doing a checkup on me.	Loud noises, slow videos with no progress. I can't stand tapping videos, for instance.	1,2,4	Haven't heard the clip, but I do recognize the person from the second clip.	Something to do with sounds vs words as triggers?	956624
2	1136	2	2	33	2	1	1	2	310.608	310.608	315.47	1	1	15.3	15.3	308.381	1	1	19.831	19.831	313.134	1	Anxiety	N/A	Xanax	1	3	6	N/A	1	1	2,4,9,10	Mouth sounds	Loud/sudden noises.	1	N/A	I have no idea, though I do feel that the researchers may be confusing ASMR with frission.	779959
2	2200	2	2	25	2	1	1	6	311.855	311.855	315.14	1	1	154.216	154.216	450.505	1	1	18.203	18.203	313.632	1	N/A	N/A	Wellbutrin (antidepressant), Abilify (mood stabilizer), Adderall (adhd)	1	2017-02-05	4,5	N/A	1	1	1,4,9	Tongue clicking, scratching sounds	Whispering, mouth sounds, water pouring, loud noises	1	N/A	Unclear.	799004
2	1116	2	2	32	2	1	1	4	52.78	223.166	303.613	2	1	10.313	287.885	303.058	3	1	16.706	18.54	310.669	2	Yes. Shoulder/rotator cuff injury.	Music has colors.	n/a	1	2017-01-02	6	n/a	1	1	1,2,4,9,10	writing, writing on a clipboard, writing on a chalkboard, typing, mouth sounds	loud noises	2	n/a	Not sure. I disliked how loud the first two songs were. I wish there had been a warning. People with ASMR can be sensitive to loud noise.	729306
2	2180	2	2	19	1	1	1	4	7.658	268.922	309.64	2	2	304.62	304.62	309.59	1	1	237.506	238.982	304.689	4	N/A	N/A	N/A	1	As many as circumstances allow; typically 4-5 30m-1h videos.	4,5,7	The more I focus on the sound and its source, the more intense it is. Relatively intense sensations can occur by simply glancing at the video in question and away from whatever else I am doing at the moment.	1	2		N/A	N/A	1	N/A	To obtain evidence that ASMR is distinct from frisson, given how the second clip could possibly cause someone to experience frisson, the third clip could cause someone to experience ASMR, and the first could potentially cause both.	480172
2	25096	2	2	20	1	1	1	7	27.733	9450.55	9451.37	12	3	10.336	568.16	569.287	18	1	4.286	14480.1	14481.1	5	N/a	N/a	Medical marijuana for anxiety and insomnia. ASMR is also one of the tools I use for my anxiety amd insomnia.	1	Probably about 5 before I find the one thats the most effective.	5,6	Not really although its easier to fall asleep with the lights off	1	1	1,2,3,4,7,8,9,10	N/a	M/a	1,3	N/a	I believe the purpose was to get some insight into this phenomenon that we know so little about.	397322
2	1176	2	2	47	1	1	1	1	3.688	310.434	311.588	2	1	6.118	303.604	305.682	2	1	4.784	303.761	304.965	2	N/A	N/A	Lisinopril, Atorvastatin	1	2	6	Dark room, headphones, no interruptions	1	1	4	N/A	N/A	1	N/A	To see if people would really sit through five minute clips of "noise"	452815
2	1680	2	2	24	2	1	1	1	316.934	328.288	328.938	5	1	174.289	317.647	318.414	6	1	11.749	319.635	320.285	6	N/A	N/A	N/A	1	1	5	Easier in dark, quiet rooms	1	1	1,2,4,9	Sounds of and watching writting, using a keyboard	Very loud or very harsh sounds	1,2	N/A	I'm not sure. Only the first video resembles a common ASMR video, the other two were just music. Probably to just collect data. Or to differentiate ASMR from musical stimulation?	329283
2	1508	2	2	36	2	1	1	2	90.731	91.163	302.476	2	1	18.574	18.574	475.725	1	1	23.247	23.247	302.274	1	N/A	N/A	N/A	1	2017-03-07	7	N/A	1	1	1	Mic Brushing, Scalp Massage, Shaving, Shampoo, Haircut	other louder sounds	1,2,4	N/A	know more about ASMR	492630
2	1676	2	2	20	2	1	1	3	40.87	350.925	357.824	5	1	5.4	75.365	312.607	4	1	3.855	74.19	311.994	4	Major depression	N/A	Mirtazapine, Bupropion and Abilify	1	3	6	N/A	1	1	1,2,4,10	Hair brushing, crunchy eating sounds (but I've only experienced this one once)	Mouth sounds trigger misophonia for me	1,2,4	N/A	Find out what triggers ASMR for people I guess	526973
2	1297	2	2	18	1	1	1	2	324.751	325.224	326.204	2	4	304.298	307.666	308.108	4	1	51.779	295.061	302.194	5	No	No	Onfi (Epilepsy medication)	1	2017-02-05	5,6	N/A	1	1	1,2,4	N/A	Movement, like walking or looking around.	1	N/A	To determine if ASMR is similar in most people, and how the average reacts to aural stimuli.	32092
2	1734	2	2	46	2	1	1	6	4.883	304.031	306.405	3	7	8.9	338.13	338.908	8	1	5.615	330.146	330.987	3	N/A.	N/A.	N/A.	1	6 to 10	2,3,4,6	N/A	1	1	1,3,4,9,10	face brushing by makeup artist on model, pouring sound of salt or stones, coffeebeans, etc, visual effect of travel in space through tunnel or asteroids	N/A	1,3,8,9	N/A	to give experience of ASMR to participant, and prove it exists?	279409
2	1276	2	3	21	1	4	1	5	46.89	57.711	302.707	2	2	39.662	106.691	303.624	6	2	24.642	25.012	522.304	2	N/A	N/A	N/A	1	2017-03-05	5,6,7	N/A	1	1	1,2,3,4	N/A	N/A	1	N/A	what causes asmr?	565498
2	1505	2	3	27	2	1	1	3	247.824	309.449	312.766	2	2	300.133	418.253	419.686	3	2	310.774	310.774	311.793	1	IBS, anxiety, panic disorder, depression	N/A	N/A	1	2017-01-02	5,6,7	N/A	1	1	1,3,9,10	soft speaking, typing, paper sounds, water spraying, plastic caps twisting	sometimes whispering	1	N/A	To determine what the common audible stimuli of ASMR tingling sensations are	492929
2	1131	2	3	22	2	1	1	1	67.732	67.732	390.165	1	1	9.748	9.748	306.263	1	1	165.724	165.724	309.435	1	N/A	N/A	Yes - I take the Ortho Evra birth control patch weekly and am constantly changing antidepressants	1	4	5,6	N/A	1	1	4	N/A	Yes - mouth sounds	1	N/A	No idea, just saw it on Reddit and I wanted to help	755668
2	1228	2	3	27	1	4	1	1	2.519	286.653	305.691	3	1	3.607	220.055	405.569	7	1	1.61	130.156	305.272	3	n/a	n/a	n/a	1	1	6	n/a	1	1	2,4	n/a	n/a	1,2	n/a	The purpose of this study was to see waht types of stimuli can produce an ASMR type sensation.	214542
2	1268	2	3	27	1	1	1	3	13.991	304.478	305.288	26	1	7.051	314.834	316.225	10	1	2.133	316.512	318.403	18	COPD	n/a	N/a	1	2017-01-02	4,5,6	N/A	1	1	1,2,9	Cutting stuff, the sound of burning peat, the sounds of carving.	A jump scare maybe? Music generally also.	1,5,6,10	N/a	No idea	319994
2	1550	2	3	32	2	5	1	1	2.789	424.955	425.803	5	1	5.592	309.201	310.351	4	1	2.185	371.711	372.656	3	Fibromyalgia, Arthritis, OCD, Clinical Depression, GAD	N/A	Gabapentin, Ibuprofen, Suboxone, Wellbutrin	1	Between 1 and 3 in a single session. Usually I'm too asleep to watch more than that. :-)	3,5,6	Yes, I need to have a low body temperature and room temperature to experience ASMR. If I'm hot or sweating or the room is hot, my tingles are very stunted and usually don't happen at all.	1	1	2,4,9,10	"Low" crinkles from soft plastic bags (not "high" crinkles from crisper bags), the sound of a "wet" mouth when speaking softly or whispering, the sounds of glass clinking or clicking, and opening screw-top lids.	Yes. If I'm really hot or sweating, I can't get tingles at all.	1,2,4,5,9	N/A	To try and figure out if there are universal or near-universal triggers or "anti-triggers" in most people, so that we can develop non-drug non-addictive treatments for chronic pain, mental illness, and insomnia and better facilitate those treatments. At least that's what I'm hoping the study is for.	353923
2	1599	2	3	20	1	1	1	2	75.142	75.142	305.12	1	1	307.562	307.562	308.387	1	1	0.225	305.574	306.38	2	N/A	N/A	Sertraline 100mg daily	1	2 - 3 in their entirety	4,5,6	I prefer my room to be dark and quiet	1	1	1,2,4,8,9,10	Slow talking, hand movements, foreign (Non-English) accents (especially Korean and German)	Harsh, loud, or particularly abrasive noise	1,2,4,5,6,8,9	N/A	To develop some understanding of what causes ASMR	82313
2	1960	2	3	37	1	1	1	2	310.116	312.876	313.793	4	1	7.509	340.106	341.345	7	1	310.108	311.974	313.097	4	Anxiety, depression, hypertension	N/a	Lisinopril, sertraline	1	2017-03-05	6	Quiet; cool	1	1	4,10	Tone of voice, soft and slow	Too warm, sudden noises	1	N/a	To determine whether asmr is produced by suggestion rather than the content of recordings.	210003
2	1164	2	4	32	2	1	1	3	308.298	313.728	314.333	9	1	308.378	311.446	312.171	4	2	317.907	320.685	321.918	3	N/A	N/A	Citalopram for OCD	1	2017-03-05	6	N/A	1	1	1,4	Hand movements at the camera	Loud noises, a lot of talking	1	N/A	To better understand the ASMR phenomenon.	33022
2	1156	2	4	17	1	3	1	5	27.571	297.736	304.353	4	4	92.926	270.999	305.972	4	3	172.709	172.709	304.863	1	N/A	N/A	N/A	1	Two to three.	6	N/A	1	1	1,2,4,9,10	Brushing or caressing, Pointing or describing in great detail.	Yes, most music will stop my ASMR	1,2	N/A	To gain insight as to what causes ASMR.	857977
2	1339	2	4	28	2	1	1	1	42.039	191.251	326.524	18	1	29.13	355.167	359.988	23	2	317.349	320.605	321.454	6	N/A	N/A	N/A	1	1, but it may take going through 3 or 4 videos before I find one I like	6	N/A	1	1	1	Word sounds like sk, ks, perfect, mouth sounds	Talking	1,2,4	N/A	To find a link, of any, in asmr triggers	160940
2	1255	2	4	33	1	1	1	1	27.101	278.938	309.622	11	2	36.288	302.038	305.792	10	1	33.968	38.048	302.661	3	N/A	N/A	N/A	1	2	6	N/A	1	1	1,2,3,4,9,10	N/A	Generally speaking, anything distracting.	1	N/A	To see how many people you can get to sit through three really annoying videos.	472221
2	1621	2	4	20	1	1	1	1	18.799	322.916	323.566	6	1	219.719	330.352	331.15	8	1	68.599	308.236	309.184	5	Chronic back pain. Bipolar disorder.	No.	Lamotrigine 100mg daily.	1	3-4 videos. About an hour's worth usually.	5,6	I need to be relaxed. Any setting.	1	1	1,2	Brushing, tapping, scratching. Crisp mouth sounds.	N/A	1,6,10	N/A	To torture me for 15 minutes then ask some questions you can put into charts to prove or disprove some hypothesis. Honestly I have no clue.	510969
2	1333	2	4	19	1	1	1	1	39.189	39.189	309.387	1	1	307.174	307.174	309.035	1	1	312.461	312.461	314.888	1	N/A	N/A	N/A	1	3	6	N/A	1	1	2,4,10	soft speaking	N/A	1,4	N/A	To find out more about the causes and effects of ASMR	333529
2	1487	2	4	37	1	1	1	1	192.87	192.87	309.906	1	2	266.415	266.415	332.277	1	1	188.101	188.101	360.089	1	N/A	N/A	N/A	1	1 to 5	6	N/A	1	1	1,2,9	Soft speaking instructional videos, writing sounds	Chewing sounds (i.e. people eating)	1	N/A	Don't know	935110
2	1149	2	4	19	2	1	1	2	123.042	123.042	310.371	1	1	74.733	74.733	309.735	1	1	307.655	307.655	308.604	1	N/A	N/A	N/A	1	1 or 2	6	N/A	1	1	1,4	N/A	N/A	2,4	N/A	To find out why certain people may or may not be affected by nontraditional triggers	777070
2	1321	2	4	22	1	1	1	1	36.928	37.527	384.006	2	1	185.326	186.943	348.264	3	2	305.04	305.04	305.806	1	N/A	N/A	N/A	2	N/A	8	N/A	1	1	1,2,4,9,10	Morning light through curtains	Recall of personal focus stops the sensation	1	N/A	To check baseline ASMR response	316540
2	2949	2	4	41	1	1	1	1	297.821	297.821	303.601	1	1	302.421	302.421	304.022	1	1	313.028	313.028	318.144	1	N/A	The months of the year. I can't hear or say any month without my brain "Seeing" it's associated colour. Examples: April is extremely light Blue. September is brown. November is a beigey Orange.	Not regularly. Anti-depressants mainly. Current not taking anything.	1	Hard to determine. I don't ACTIVELY watch any of them. I listen to them to relax or fall asleep. Active watching or listening requires too much focus. So I'll put on ONE and potentially LOOP it all night so long as there are no "sound spikes" in the video which inevitably wake me up.	6	No specific conditions required as long as the asmr source can be heard clearly.	1	1	2,4,9,10	Here's a rare one: It's not required, but: I will occasionally "scratch" my rib cage or shift my shoulders akin to how you move when you have a shiver - and that will make the asmr sensation 10x as strong. It's almost like normal asmr sounds build a growing kinetic "tingle supply" and the movement "releases" the flood of them.	Dear lord, REPEATING TAPPING or any sort of "sound/volume spike" E.g.; loud crinkling in the middle of soft noises, etc. Sharp noises whether it be fingernails tapping or even vocal "K"s and "T"s drives me absolutely insane. Very Misophonic. Further: this is a personal case, but if the sound is vocal, it needs to be idle and relaxing. If the voice is explaining something I have interest in or, an…	2,4	N/A	It'd be nice if one of these studies was being conducted to bring some validity to the phenomenon. While "asmr" as a label has only existed for a few years, I've known the sensation my whole life.	130268
2	1083	2	4	52	2	1	1	2	304.604	304.604	305.988	1	1	307.356	307.356	308.715	1	2	311.026	311.026	312.667	1	n/a	n/a	n/a	1	4	6	n/a	1	1	1,4	n/a	loud talking, loud noise	1	n/a	learn about what might interrupt ASMR	260767
2	1257	2	5	45	1	1	1	5	22.167	312.828	314.748	2	1	23.888	25.857	303.585	2	1	43.504	84.961	315.261	2	N/A	N/A	N/A	1	5	5,6	N/A	1	1	2,3,4,9,10	N/A	N/A	1,2,4	N/A	Well, it said it was to determine how ASMR works.	334963
2	1731	2	5	27	1	1	1	6	6.442	319.607	321.423	2	1	3.993	70.215	520.691	19	1	7.54	318.209	319.885	5	N/A	N/A	N/A	1	5	5,6	Quite, private space.	1	1	1,4,10	Breathing	too crisp sounds, i.e crinking plastic	1	N/A	Compare participants responses between a audio sample of ASMR and two audio samples that typically elicit two different emotional responses.	840477
2	1191	2	5	17	1	6	1	5	309.696	309.696	310.511	1	1	60.896	119.768	302.993	2	1	303.382	303.382	304.934	1	N/A	N/A	N/A	1	3	5,6	Quiet room, dim lighting	1	1	1,2,9,10	N/A	Harsh noises, loud sounds	1	N/A	To gather information on ASMR	185817
2	1450	2	5	25	1	1	1	5	306	316.386	317.106	3	1	322.279	322.894	323.499	2	2	312.051	312.051	313.106	1	N/A	N/A	N/A	1	2017-05-06	5,6,7	Headphones	1	1	1,2,3,4,10	N/A	N/A	1,2,4,5	N/A	To figure out if there are specific sounds/characteristics of sounds that trigger ASMR	688312
2	3023	2	5	19	1	1	1	7	312.906	312.906	315.376	1	1	24.798	310.097	311.154	2	1	347.662	347.662	349.133	1	Moderate to severe Social Anxiety Disorder and Panic disorder without agoraphobia.	N/A	Under medication transition, 3 days after stoping bupropion + Fluoxetine. Starting 75mg Venlafaxine and 2.5mg Diazepam on demand.	1	2	7	Can't achieve ASMR if anxiety level is too high, need to control it first. Works well with moderate anxiety.	1	1	1,2,3,4,8,10	N/A	N/A	1	N/A	Maybe understand what causes or interfere with ASMR on different scenarios and group of peoples.	497871
2	1754	2	5	23	1	1	1	6	11.695	20.903	310.498	3	1	9.508	10.384	455.011	2	1	8.223	22	320.47	2	N/A	N/A	N/A	1	1	6	N/A	1	1	1,4	brushing	Loud noices, e.g. screaming &gt;:(	2,4	N/A	study asmr	69494
2	1691	2	5	22	1	1	1	6	504.555	504.555	505.573	1	1	304.332	305.323	307.03	2	1	308.709	308.709	311.085	1	n/a	N/A	Ibuprofen 600mg	1	4 or 5	4,6	n/a	1	1	1,2,4,10	Mouth sounds	n/a	1,2,4	Yes, the first Gentle Whispering one.	To categorize and describe the occurrences of ASMR.	27409
2	1291	2	5	31	1	1	1	3	309.636	309.636	310.615	1	1	305.62	305.62	307.504	1	1	310.737	310.737	312.13	1	N/A	N/A	N/A	1	1	6	N/A	1	1	1,4,9,10	N/A	Loud noises	1	N/A	Not really sure	548749
2	1305	2	5	29	2	1	1	4	26.478	30.874	310.011	2	1	5.051	364.27	366.129	2	1	73.576	198.28	401.249	3	N/A	N/A	N/A	1	3	7	N/A	1	1	2,4,9,10	N/A	N/A	2,4,5,9	The first clip, from Maria, was one of the first ASMR videos I ever watched.	To see how many people you could get to put headphones on and listen to women screaming for 5 minutes. Seriously, jerk move.	345163
2	1300	2	5	26	1	4	1	5	31.886	338.576	342.025	4	1	5.042	113.582	341.248	26	1	11.294	52.581	316.326	2	N/A	N/A	N/A	1	1	6	Dim or no lighting.	1	1	1,2,4	N/A	N/A	1,2,4	N/A	To find out what are the causes of the ASMR sensation.	965366

## Sheet: Legend
LSU/ASMR
1	LSU
2	ASMR Reddit
Instructions
1	Encouraging
2	Discouraging
ASMR
1	Personal Attention
2	Tapping
3	Repetitive Noise
4	White Noise
5	Whispering
Gender
1	Male
2	Female
All Yes/No responses
1	Yes
2	No
